# Supplementary material for: Flexible resistive switching bistable memory devices using ZnO nanoparticles embedded in polyvinyl alcohol (PVA) matrix and poly(3,4-ethylenedioxythiophene) polystyrene sulfonate (PEDOT:PSS)
Source: Royal Society of Chemistry journal article supplement (doi:10.1039/c8ra04582h), 2018-01-01
Supplement: c8ra04582h1.pdf [file c8ra04582h1.pdf]

## Supporting Information

### **Flexible Resistive Switching Bistable Memory Devices using ZnO nanoparticles embedded in polyvinyl alcohol (PVA) matrix and poly(3,4-ethylenedioxythiophene) polystyrene sulfonate (PEDOT:PSS)**

Jehova Jire L. Hmar\*

Department of Physics and Astronomical Sciences, Central University of Jammu, Rahya-Suchani, Samba, 181143, J&K, India

\*Corresponding Author's email: [jehovajire52@gmail.com](mailto:jehovajire52@gmail.com)

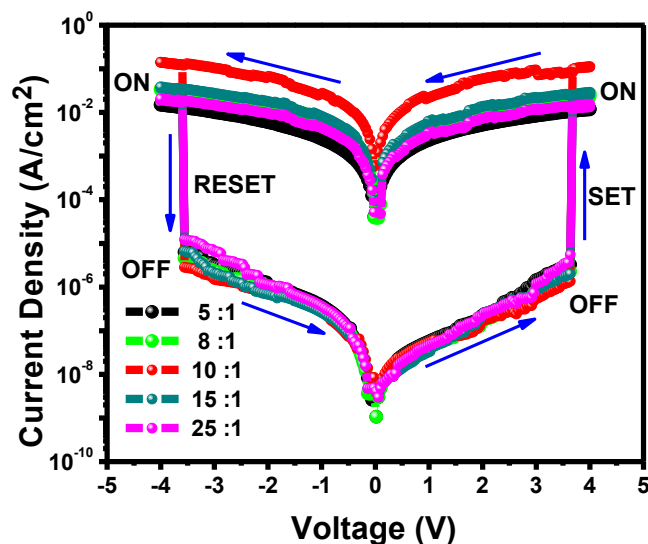

**Figure SF 1** Current-voltage ( $I$ - $V$ ) switching characteristics of Al/ZnO-PVA/PEDOT:PSS/Al/flexible PET substrate devices at different concentration of ZnO in ZnO-PVA nanocomposites

**Figure SF 1** shows the resistive switching behaviour of ZnO-PVA/PEDOT: PSS device with different concentration of ZnO in ZnO-PVA nanocomposites. It is observed that, the ON state/OFF state current ratio increases with increasing concentration of ZnO and reaches maximum at concentration ratio of 10:1 with ON state/OFF state current ratio  $\sim 3 \times 10^5$  in magnitude and beyond the value 10:1, the ON state/OFF state current ratio decreases. It

should be noted that, the increase of ON state/OFF state current ratio with increasing concentration of ZnO due to the increase of conducting phase in insulating matrix. After a certain concentration of ZnO, the value of ON state/OFF state ratio decreases. This may be due to the formation of interconnected paths created by ZnO nanocomposite/PEDOT:PSS in the device, which causes depolarization and charge captured in the valence subband of ZnO are released into the PVA matrix. As a result, the “ON state/OFF state” current ratio decreases. This kind of phenomena has been investigated for insulating/conducting nanocomposites and the value of the optimum concentration (for this case, concentration of ZnO:PVA is 10:1) depends on the nature of conducting phase and the insulating matrix.
